# Supplementary material for: Humoral Responses to Rv1733c, Rv0081, Rv1735c, and Rv1737c DosR Regulon-Encoded Proteins of Mycobacterium tuberculosis in Individuals with Latent Tuberculosis Infection
Source: Hindawi journal article supplement (doi:10.1155/2017/1593143), 2017-01-01
Supplement: f1 [file 1593143.f1.pdf]

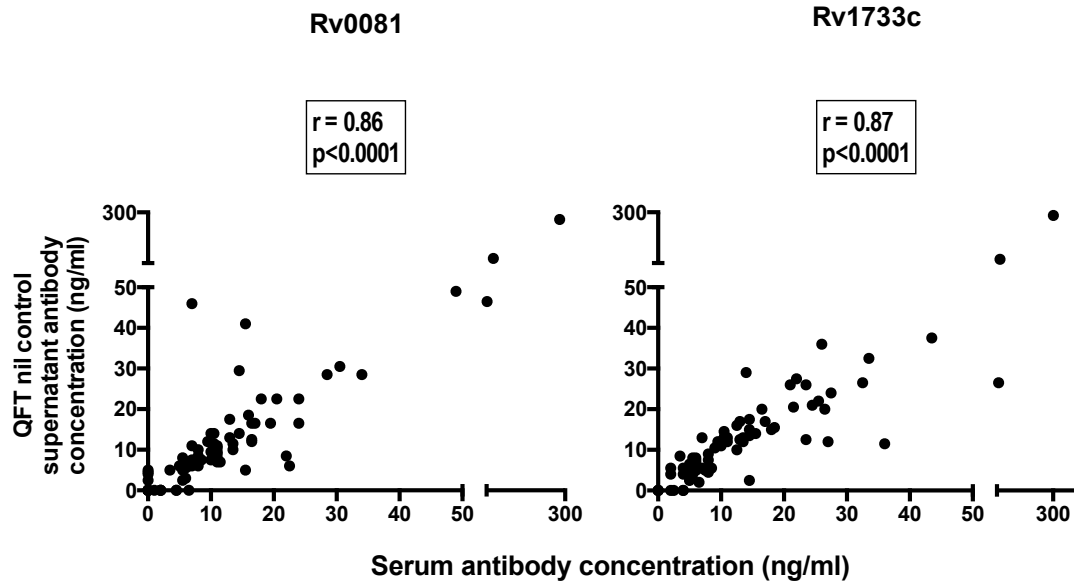

**Figure S1: Correlation of concentrations of IgG antibodies to Rv0081 and Rv1733c antigens between paired QFT supernatant and serum samples.** Scatter plots were created by plotting each antibody concentration obtained from analysis of supernatant against antibody concentration obtained from analysis of serum from the same individual. Spearman's correlation was used to generate the  $r$  and  $p$  values shown.
